# Supplementary material for: Fat body-derived cytokine Upd2 controls disciplined migration of tracheal stem cells in Drosophila
Source: eLife. 2025 Jun 9;13:RP100037. doi: 10.7554/eLife.100037 (PMC12148326; doi:10.7554/eLife.100037)
Supplement: Source data 1. [file elife-100037-data1.xlsx]

## Sheet: Fig 1F
		migration distance (μm)
		control posterior
	0h	56.45	57.315	55.13	54.052	50.777	51.442
	1h	87.596	93.142	110.753	106.958	99.175	102.931
	2h	115.351	112.775	131.836	126.514	118.231	133.385
	3h	176.588	137.976	164.989	166.411	151.413	166.217
		rprhid posterior
	0h	61.303	77.439	67.689	57.159	55.397	61.615
	1h	92.174	128.704	118.295	111.198	103.786	102.391
	2h	126.55	154.496	135.809	136.708	140.605	137.142
	3h	181.424	193.366	166.259	149.196	165.82	173.665
		control anterior
	0h	-24.201	-21.977	-21.381	-19.308	-20.032	-18.692
	1h	-22.784	-22.561	-18.29	-20.602	-20.903	-19.225
	2h	-21.003	-20.452	-20.286	-21.966	-21.718	-20.265
	3h	-22.766	-20.083	-20.417	-21.023	-23.963	-20.061
		rprhid anterior
	0h	-25.45	-23.42	-19.899	-26.79	-24.799	-21.45
	1h	-36.207	-44.82	-32.317	-49.132	-44.486	-50.073
	2h	-51.169	-61.648	-57.294	-68.417	-67.455	-61.992
	3h	-82.002	-78.652	-75.833	-79.326	-93.922	-97.004

## Sheet: Fig 1K
Entropy of binary
	control	rpr.hid
	0.401685	0.834127
	0.794416	0.984282
	0.666156	0.853804
	0.083297	0.77562
	0.200443	0.969008
	0.67518	0.901224
	0.995575	0.996509
	0.100597	0.998081
	0.287157	0.952548
	0.166242	0.549974

## Sheet: Fig 1L
	X_variance
	control	rpr.hid
	0.398232	0.342284
	0.525227	0.551385
	0.375866	0.739513
	0.090644	0.683931
	0.432735	0.725271
	0.552834	0.778346
	0.637652	0.701066
	0.550799	0.802552
	0.502165	0.380318
	0.502291	0.621863

## Sheet: Fig 2F
		migration distance (μm)
		control posterior
	0h	54	51.356	56.725	48.818	55.105	60.885
	1h	82.931	82.15	91.92	92.173	89.126	87.383
	2h	108.788	118.035	127.727	111.126	124.318	127.911
	3h	138.457	144.137	156.318	147.107	162.799	148.187
		upd2RNAi posterior
	0h	57.248	62.542	59.899	44.616	59.439	43.485
	1h	91.586	92.242	103.158	87.724	95.434	85.791
	2h	126.443	118.067	125.513	137.72	126.671	123.344
	3h	157.276	132.391	169.091	156.569	167.504	160.847
		control anterior
	0h	-21.012	-22.883	-20.926	-19.57	-19.349	-20.671
	1h	-21.539	-17.989	-17.834	-19.377	-21.155	-21.283
	2h	-20.117	-19.999	-18.536	-19.468	-21.854	-21.296
	3h	-20.932	-19.203	-19.288	-20.137	-22.041	-21.948
		upd2RNAi anterior
	0h	-21.021	-28.928	-19.65	-20.535	-29.487	-29.97
	1h	-46.207	-47.464	-36.25	-38.554	-47.06	-39.903
	2h	-57.916	-62.193	-50.294	-63.791	-70.631	-52.17
	3h	-72.165	-78.191	-63.636	-89.681	-81.743	-76.265

## Sheet: Fig 3E
	migration distance (μm)
		control anterior
	0h	-17.097	-20.805	-18.215	-23.338	-21.462	-17.411
	1h	-17.173	-20.656	-21.06	-20.671	-22.562	-16.613
	2h	-16.106	-19.294	-21.567	-21.437	-21.964	-18.732
	3h	-21.06	-20.496	-20.164	-24.972	-22.065	-20.807
		domeRNAi anterior
	0h	-16.755	-19.275	-19.275	-21.855	-18.983	-27.657
	1h	-31.093	-33.742	-43.742	-45.042	-37.25	-46.667
	2h	-44.244	-55.597	-59.324	-57.62	-61.307	-64.178
	3h	-66.497	-74.614	-78.614	-79.698	-80.895	-85.968
		hopRNAi anterior
	0h	-19.121	-20.586	-21.527	-23.39	-25.491	-24.036
	1h	-22.103	-35.397	-26.677	-32.241	-35.789	-33.573
	2h	-38.416	-40.615	-39.244	-42.53	-42.155	-54.681
	3h	-64.004	-66.704	-57.374	-71.857	-67.959	-98.581
		stat92ERNAi anterior
	0h	-20.391	-18.203	-23.014	-23.923	-22.896	-20.747
	1h	-38.337	-34.148	-41.614	-46.613	-44.623	-39.882
	2h	-50.456	-47.743	-57.187	-67.916	-60.148	-56.644
	3h	-69.721	-59.052	-72.066	-85.565	-81.17	-78.844

## Sheet: Fig 3H
	migration distance (μm)
		DMSO
	0h	-20.364	-17.535	-14.975	-14.684	-15.883	-27.209
	1h	-30.633	-30.051	-17.757	-19.397	-20.275	-25.805
	3h	-23.597	-39.182	-22.596	-23.858	-25.925	-27.535
		Tofacitinib
	0h	-15.08	-20.697	-18.534	-21.098	-34.122	-20.68
	1h	-28.58	-31.475	-35.525	-27.651	-37.817	-52.422
	3h	-89.705	-77.452	-90.152	-74.771	-50.18	-56.842

## Sheet: Fig 4H
		Intensity of Ds-GFP
	control	domeRNAi	hopRNAi	stat92ERNAi
	0.968593	0.579839	0.595524	0.546894
	0.852829	0.600511	0.740187	0.560728
	0.987295	0.438562	0.667406	0.581545
	0.912186	0.64807	0.825823	0.534925
	1.07305	0.589176	0.583013	0.50645
	1.20605	0.721829	0.737568	0.6067

## Sheet: Fig 4M
		Intensity of Fj-GFP
	control	domeRNAi	hopRNAi	stat92ERNAi
	0.916554	0.581519	0.418034	0.630746
	1.03386	0.700481	0.641015	0.425803
	1.15671	0.570029	0.665183	0.323721
	0.908027	0.670195	0.590425	0.465211
	1.04378	0.358261	0.612112	0.262789
	0.941071	0.447582	0.424296	0.377365

## Sheet: Fig 4R
		Intensity of Ft-GFP
	control	domeRNAi	hopRNAi	stat92ERNAi
	0.883886	2.10564	1.89648	2.35876
	1.02909	1.71437	2.07706	2.17819
	1.04982	1.49874	1.94373	2.14128
	1.0372	1.61297	1.73834	2.23647

## Sheet: Fig 5E
	migration distance (μm)
		control
	0h	-12.565	-17.508	-12.417	-18.816
	1h	-19.587	-14.784	-12.026	-16.413
	3h	-20.039	-17.128	-19.018	-21.124
		dsRNAi
	0h	-19.587	-13.151	-21.145	-20.341
	1h	-30.096	-24.11	-34.306	-26.61
	3h	-68.418	-52.907	-56.648	-71.231
		ftRNAi
	0h	-18.49	-20.973	-18.109	-22.619
	1h	-32.573	-36.853	-25.411	-31.194
	3h	-53.22	-64.49	-63.774	-71.615
		fjRNAi
	0h	-16.726	-19.515	-18.293	-17.56
	1h	-21.46	-26.817	-35.416	-31.376
	3h	-57.652	-71.226	-75.314	-64.546

[truncated: 39 more sheets: Fig 5K, Fig 5k’, Fig 5L, Fig 5L’, Fig 5M, Fig 6C, Fig 6F, Fig 6J, Fig 6N, Fig 7F, Fig 7I, Fig 7M, Fig 7P, Fig 7V, Fig1-figure supplement 1E, Fig1-figure supplement 1H, Fig 2-figure supplement 1J, Fig 2-figure supplement 1M, Fig 3-figure supplement 1D, Fig 3-figure supplement 2A …]
